# Supplementary material for: Spatial Covariant Management of Thermodynamics Contributes to Protein Fold Function through Quality Assurance
Source: Research Square preprint supplement (doi:10.21203/rs.3.rs-717846/v1), 2021-07-26
Supplement: Supplementary file 1 [file a39ed28cb54517cf028ab157.xlsx]

## Sheet: TableS1
Variogram constructions and cross-validations
Figure	2B	2D	3B	4B	5B	5D
y-z axis	TrIdx (37°C) - ClCon (37°C)	ClCon (37°C) - TrIdx (37°C)	TrIdx (37°C) - Delta_TrIdx (27°C-37°C)	TrIdx (37°C) - Stab (37°C)	TrIdx (27°C) - ClCon (27°C)	TrIdx (37°C) - Delta_ClCon (27°C-37°C)
Cutoff	0.5	0.5	0.5	0.5	0.5	0.5
Width	0.01	0.01	0.01	0.01	0.01	0.01
psill	0.07	0.12	0.02	0.04	0.05	0.055
model	Sph	Sph	Sph	Sph	Sph	Sph
range	0.14	0.12	0.15	0.1	0.15	0.08
nugget	0.01	0.01	0.03	0	0.02	0.001
nmin	5	5	5	5	5	5
nmax	15	15	15	15	15	15
Pearson	0.57	0.79	0.6	0.81	0.52	0.23
