# Supplementary material for: Spatial Covariant Management of Thermodynamics Contributes to Protein Fold Function through Quality Assurance
Source: Research Square preprint supplement (doi:10.21203/rs.3.rs-717846/v1), 2021-07-26
Supplement: Supplementary file 2 [file ce55bf49c9e0a17f400f3fd1.xlsx]

## Sheet: TableS2
Differential Energetics based Correction
Variants	Position	ΔTrIdx	ΔClCon	DEC
	1	0.0288199	0.0683025	-0.0394826
	2	0.0287344	0.0680557	-0.0393212
	3	0.0287851	0.0678018	-0.0390167
	4	0.0288357	0.0675409	-0.0387052
	5	0.0288863	0.0672659	-0.0383796
	6	0.0289338	0.0669768	-0.038043
	7	0.0289844	0.0666877	-0.0377032
	8	0.0290319	0.0663844	-0.0373526
	9	0.0290825	0.0660742	-0.0369917
	10	0.02913	0.0657498	-0.0366198
	11	0.0291743	0.0654184	-0.0362441
	12	0.0292217	0.0650728	-0.0358511
	13	0.0290983	0.0647273	-0.035629
	14	0.0291426	0.0643677	-0.035225
	15	0.0291838	0.0665819	-0.0373981
	16	0.0292249	0.0662222	-0.0369973
	17	0.029266	0.0658556	-0.0365895
	18	0.029304	0.0654748	-0.0361708
	19	0.0293451	0.0650799	-0.0357347
	20	0.0293831	0.0646779	-0.0352948
	21	0.0294179	0.0642689	-0.034851
	22	0.0294559	0.0638458	-0.0343899
	23	0.0294907	0.0634086	-0.0339179
	24	0.0295255	0.0629644	-0.0334389
	25	0.0295571	0.0625131	-0.0329559
	26	0.0295888	0.0620406	-0.0324518
	27	0.0296204	0.0615681	-0.0319477
	28	0.0296489	0.0610816	-0.0314327
	29	0.0296774	0.060588	-0.0309106
	30	0.0297027	0.0600943	-0.0303916
R31C	31	0.0299558	0	0.0299558
	32	0.0298831	0	0.0298831
	33	0.0298103	0.000832097	0.0289782
	34	0.0294053	0.0654959	-0.0360907
	35	0.0292344	0.0686057	-0.0393713
	36	0.0290604	0.0717155	-0.0426551
	37	0.0288832	0.0748182	-0.0459351
	38	0.028706	0.0779069	-0.0492009
	39	0.0285288	0.0809743	-0.0524456
	40	0.0283484	0.0840277	-0.0556793
	41	0.0281649	0.087067	-0.0589021
	42	0.0279814	0.0900851	-0.0621037
	43	0.0277978	0.0930821	-0.0652842
	44	0.0276111	0.0960649	-0.0684538
	45	0.0274213	0.0990196	-0.0715983
	46	0.0272314	0.101953	-0.0747216
	47	0.0270384	0.104872	-0.077834
	48	0.0268454	0.107757	-0.0809112
	49	0.0266492	0.110627	-0.0839774
	50	0.0264499	0.113468	-0.0870186
	51	0.0262505	0.116282	-0.0900315
	52	0.026048	0.119067	-0.0930195
	53	0.00113913	0.121825	-0.120686
	54	0.00107584	0.124554	-0.123478
	55	0.00101256	0.0328819	-0.0318694
	56	0.000952436	0.0329172	-0.0319648
	57	0.000889151	0.0331005	-0.0322114
	58	0.000825866	0.033298	-0.0324721
	59	0.000762581	0.0335095	-0.032747
	60	0.000699297	0.0337352	-0.0330359
	61	0.000636012	0.033982	-0.033346
	62	0.000572727	0.0342429	-0.0336702
	63	0.000506278	0.034525	-0.0340187
	64	0.000442993	0.0348282	-0.0343852
	65	0.000379709	0.0351455	-0.0347658
	66	0.000319588	0.035484	-0.0351644
P67L	67	0	0.381559	-0.381559
	68	1.89854e-05	0.381552	-0.381533
	69	0.000174033	0.372258	-0.372084
	70	0.000591713	0.0380931	-0.0375014
	71	0.000778403	0.0397291	-0.0389507
	72	0.0388727	0.0403779	-0.00150521
	73	0.0393536	0.0410407	-0.0016871
R74W	74	0.041423	0.0577461	-0.0163231
R75Q	75	0.0413123	0.0581692	-0.0168569
	76	0.0412364	0.0586346	-0.0173983
	77	0.0227825	0.00521119	0.0175713
	78	0.0243741	0.0332486	-0.00887451
	79	0.0246811	0.0420068	-0.0173258
	80	0.02495	0.0411888	-0.0162388
	81	0.0261366	0.0405471	-0.0144105
	82	0.00163275	0.0411112	-0.0394785
	83	0.00136379	0.0416965	-0.0403327
	84	0.00109483	0.04231	-0.0412152
G85E	85	0	0.0820674	-0.0820674
	86	1.58212e-05	0.0820885	-0.0820727
	87	0.000145555	0.0821097	-0.0819641
	88	0.00169287	0.101361	-0.0996679
	89	0.00222762	0.101932	-0.0997043
	90	0.105179	0.286425	-0.181246
	91	0.105705	0.287384	-0.181679
E92K	92	0.107201	0.320026	-0.212825
	93	0.107315	0.32004	-0.212725
	94	0.107432	0.320054	-0.212622
	95	0.106094	0.287264	-0.18117
	96	0.105799	0.286333	-0.180534
	97	0.105508	0.285395	-0.179887
	98	0.105217	0.377391	-0.272174
	99	0.104929	0.390529	-0.285599
	100	0.104641	0.403772	-0.29913
	101	0.10436	0.417043	-0.312683
	102	0.00608799	0.421062	-0.414974
	103	0.00582853	0.43458	-0.428752
	104	0.00556589	0.438818	-0.433253
	105	0.00532858	0.452513	-0.447184
	106	0.00509442	0.457019	-0.451924
	107	0.00486976	0.470699	-0.465829
	108	0.00465143	0.475579	-0.470927
	109	0.00444259	0.488434	-0.483991
D110H	110	0.00434766	0.705217	-0.700869
	111	0.00411035	0.704582	-0.700472
	112	0.00388568	0.704025	-0.700139
	113	0.00350914	0.476644	-0.473135
	114	0.00325917	0.330032	-0.326773
	115	0.00203461	0.328425	-0.32639
	116	0.00155997	0.313856	-0.312296
R117C	117	0.0120399	0.0436569	-0.031617
	118	0	0.31272	-0.31272
	119	0.0116033	0.30105	-0.289447
	120	0.00093345	0.306966	-0.306033
	121	0.00106318	0.305239	-0.304175
	122	0.00118975	0.303433	-0.302244
	123	0.00131316	0.301558	-0.300245
	124	0.00142707	0.299626	-0.298198
	125	0.00153782	0.29763	-0.296092
	126	0.00164224	0.295599	-0.293957
	127	0.00174033	0.293519	-0.291778
	128	0.00218649	0.291417	-0.289231
	129	0.00226243	0.289281	-0.287018
	130	0.00233521	0.28713	-0.284795
	131	0.00240482	0.284958	-0.282553
	132	0.00247127	0.29141	-0.288939
	133	0.00288895	0.288928	-0.286039
	134	0.00120241	0.286453	-0.285251
	135	0.00111065	0.291643	-0.290532
	136	0.00102205	0.307813	-0.30679
	137	0.000946107	0.304809	-0.303862
	138	0.000860673	0.298864	-0.298003
	139	0.000775238	0.295916	-0.295141
	140	0.000692968	0.292962	-0.292269
	141	0.000626519	0.287257	-0.28663
	142	0.000544249	0.284366	-0.283821
	143	0.000465143	0.281467	-0.281002
	144	0.000389201	0.278562	-0.278173
	145	0.00031326	0.273125	-0.272812
	146	0.000237318	0.270255	-0.270018
	147	0.000167705	0.26735	-0.267182
I148T	148	3.79709e-05	0.276404	-0.276366
	149	0	0.273069	-0.273069
	150	0	0.269705	-0.269705
	151	0	0.25386	-0.25386
	152	0	0.250073	-0.250073
	153	0	0.246258	-0.246258
	154	0	0.242415	-0.242415
	155	0	0.238551	-0.238551
	156	0	0.234666	-0.234666
	157	0	0.230759	-0.230759
	158	0	0.226831	-0.226831
	159	0	0.222889	-0.222889
	160	0	0.218926	-0.218926
	161	0	0.214956	-0.214956
	162	0	0.210965	-0.210965
	163	0	0.20696	-0.20696
	164	0	0.20294	-0.20294
	165	0	0.198921	-0.198921
	166	0	0.19488	-0.19488
	167	0	0.190839	-0.190839
	168	0	0.186792	-0.186792
	169	0	0.18273	-0.18273
	170	0	0.178675	-0.178675
	171	0	0.174613	-0.174613
	172	0	0.170552	-0.170552
	173	0	0.16649	-0.16649
	174	0	0.160715	-0.160715
	175	0	0.15666	-0.15666
	176	0	0.152612	-0.152612
	177	0	0.148586	-0.148586
G178R	178	9.49271e-06	0.0741765	-0.074167
	179	0	0.0722444	-0.0722444
	180	0	0.0882446	-0.0882446
	181	0	0.141449	-0.141449
	182	0	0.141626	-0.141626
	183	0	0.141823	-0.141823
	184	0	0.142028	-0.142028
	185	0	0.142239	-0.142239
	186	0	0.142458	-0.142458
	187	0	0.142676	-0.142676
	188	0	0.142902	-0.142902
	189	0	0.143128	-0.143128
	190	0.0245102	0.188837	-0.164327
	191	0.024545	0.189034	-0.164489
	192	0.024583	0.189225	-0.164642
	193	0.0246178	0.189415	-0.164797
	194	0.0246589	0.189612	-0.164953
	195	0.0247	0.189803	-0.165103
	196	0.0247412	0.189986	-0.165245
	197	0.0247886	0.190177	-0.165388
	198	0.0248329	0.190367	-0.165534
H199Y	199	0.0252854	0.179387	-0.154102
	200	0.0251589	0.179909	-0.15475
	201	0.0250323	0.180431	-0.155399
	202	0.0242665	0.192546	-0.168279
	203	0.0239659	0.193392	-0.169426
	204	0.000332245	0.194908	-0.194576
P205S	205	0	0.152683	-0.152683
L206W	206	0.014277	0.188569	-0.174292
	207	0.0143372	0.188555	-0.174217
	208	0.0143372	0.187715	-0.173378
	209	0.0141505	0.199816	-0.185666
	210	0.0141283	0.201417	-0.187289
	211	0.0141062	0.202242	-0.188136
	212	0.0140872	0.20385	-0.189763
	213	0.0140682	0.204682	-0.190614
	214	0.0140492	0.20629	-0.19224
	215	0.0207574	0.20789	-0.187133
	216	0.0205138	0.208729	-0.188216
	217	0.0202891	0.210316	-0.190027
	218	0.0200075	0.211853	-0.191846
	219	0.0198113	0.212721	-0.192909
	220	0.0195233	0.213581	-0.194058
	221	0.0192386	0.215083	-0.195844
	222	0.0190867	0.215964	-0.196878
	223	0.0187956	0.216832	-0.198036
	224	0.0185045	0.218249	-0.199745
	225	0.0182134	0.219145	-0.200931
	226	0.0179254	0.22004	-0.202115
L227R	227	0.0169951	0.240815	-0.223819
	228	0.0169856	0.241118	-0.224132
	229	0.017185	0.236358	-0.219173
	230	0.0179887	0.221049	-0.20306
	231	0.018264	0.22076	-0.202496
	232	0.0185393	0.220471	-0.201931
	233	0.0188177	0.220174	-0.201357
	234	0.0190962	0.219885	-0.200789
	235	0.0193746	0.219589	-0.200214
	236	0.0196531	0.2193	-0.199647
	237	0.0199284	0.218658	-0.19873
	238	0.0202068	0.218383	-0.198176
	239	0.0204853	0.218108	-0.197623
	240	0.0207637	0.217833	-0.197069
	241	0.0210422	0.217558	-0.196516
	242	0.0213206	0.217283	-0.195963
	243	0.0215991	0.217001	-0.195402
	244	0.0218807	0.216726	-0.194845
	245	0.0221592	0.216451	-0.194292
	246	0.0224408	0.216176	-0.193735
	247	0.0227192	0.215901	-0.193182
	248	0.0230008	0.215633	-0.192632
	249	0.0232793	0.215358	-0.192079
	250	0.0235609	0.215083	-0.191522
	251	0.0238425	0.214808	-0.190965
	252	0.0238425	0.21454	-0.190698
	253	0.0241242	0.214265	-0.190141
	254	0.0244026	0.21399	-0.189587
	255	0.0246842	0.213722	-0.189038
	256	0.0249658	0.213447	-0.188481
	257	0.0252475	0.213179	-0.187932
	258	0.0255291	0.212911	-0.187382
	259	0.0258107	0.212636	-0.186825
	260	0.0260923	0.212368	-0.186276
	261	0.0263771	0.2121	-0.185723
	262	0.0266619	0.211832	-0.18517
	263	0.0269435	0.211557	-0.184614
	264	0.0272283	0.211289	-0.184061
	265	0.0275162	0.211021	-0.183505
	266	0.0274972	0.210753	-0.183256
	267	0.027782	0.210485	-0.182703
	268	0.0280668	0.210217	-0.182151
	269	0.0283516	0.209949	-0.181598
	270	0.0286364	0.209689	-0.181052
	271	0.0289211	0.209421	-0.180499
	272	0	0.178428	-0.178428
	273	0	0.179592	-0.179592
	274	0	0.180763	-0.180763
	275	0	0.181954	-0.181954
	276	0	0.18316	-0.18316
	277	0	0.18328	-0.18328
	278	0	0.184507	-0.184507
	279	0	0.185755	-0.185755
	280	0	0.18701	-0.18701
	281	0	0.188287	-0.188287
	282	0	0.189584	-0.189584
	283	0	0.189612	-0.189612
	284	0	0.190924	-0.190924
	285	0	0.192243	-0.192243
	286	0	0.190839	-0.190839
	287	0	0.192222	-0.192222
	288	0	0.193625	-0.193625
	289	0	0.195042	-0.195042
	290	0	0.196481	-0.196481
	291	0	0.196347	-0.196347
	292	0	0.197778	-0.197778
	293	0	0.200888	-0.200888
	294	0	0.211162	-0.211162
	295	0	0.212481	-0.212481
	296	0	0.213835	-0.213835
	297	0	0.215217	-0.215217
	298	0	0.216627	-0.216627
	299	0	0.218073	-0.218073
	300	0	0.219554	-0.219554
	301	0	0.221063	-0.221063
	302	0	0.220626	-0.220626
	303	0	0.222149	-0.222149
	304	0	0.223707	-0.223707
	305	0	0.225294	-0.225294
	306	0	0.226909	-0.226909
	307	0	0.228552	-0.228552
	308	0	0.230195	-0.230195
	309	0	0.231824	-0.231824
	310	0	0.233424	-0.233424
	311	0	0.235004	-0.235004
	312	0	0.236555	-0.236555
	313	0	0.238079	-0.238079
	314	0	0.239573	-0.239573
	315	0	0.24104	-0.24104
	316	0	0.242479	-0.242479
	317	0	0.243875	-0.243875
	318	0	0.245229	-0.245229
	319	0	0.246548	-0.246548
	320	0	0.243572	-0.243572
	321	0	0.244552	-0.244552
	322	0	0.245455	-0.245455
	323	0	0.246273	-0.246273
	324	0	0.246992	-0.246992
	325	0	0.247598	-0.247598
	326	0	0.248078	-0.248078
	327	0	0.248416	-0.248416
	328	0	0.248578	-0.248578
	329	0	0.248564	-0.248564
	330	0	0.240547	-0.240547
	331	0	0.239531	-0.239531
	332	0	0.238205	-0.238205
	333	0	0.236562	-0.236562
R334W	334	0	0.191411	-0.191411
	335	0	0.189366	-0.189366
I336K	336	0.0549597	0.238318	-0.183359
	337	0.0547318	0.23743	-0.182698
T338I	338	0	0.540891	-0.540891
	339	0	0.537739	-0.537739
	340	1.89854e-05	0.418658	-0.418639
S341P	341	0.000132898	0	0.000132898
	342	3.16424e-06	8.46201e-05	-8.14558e-05
	343	0	0.0267188	-0.0267188
	344	9.49271e-06	0.196981	-0.196972
	345	0.000224661	0.182702	-0.182477
	346	0.000155048	0.176271	-0.176116
R347H	347	0	0.138333	-0.138333
	348	6.32848e-06	0.129821	-0.129815
	349	6.32848e-06	0.141478	-0.141471
	350	9.49271e-06	0.157125	-0.157116
	351	1.58212e-05	0.150412	-0.150396
R352Q	352	0	0.00327198	-0.00327198
	353	6.32848e-06	0	6.32848e-06
	354	5.06278e-05	0.0699808	-0.0699302
	355	0.00010442	0.143382	-0.143277
	356	0.000142391	0.144066	-0.143923
	357	0.000177197	0.144729	-0.144551
	358	0.000215168	0.145356	-0.145141
	359	0.000249975	0.145934	-0.145684
	360	0.000287946	0.146484	-0.146196
	361	0.000325917	0.146992	-0.146666
	362	0.000363887	0.147472	-0.147108
	363	0.000398694	0.147916	-0.147517
	364	0.000436665	0.148325	-0.147888
	365	0.000474636	0.14872	-0.148245
	366	0.000512607	0.149079	-0.148567
	367	0.000550577	0.149418	-0.148867
	368	0.000588548	0.149728	-0.14914
	369	0.000626519	0.150003	-0.149377
	370	0.000661326	0.150243	-0.149582
	371	0.000699297	0.150447	-0.149748
	372	0.000759417	0.153028	-0.152269
	373	0.000797388	0.153071	-0.152273
	374	0.000835359	0.153078	-0.152242
	375	0.00087333	0.153064	-0.15219
	376	0.000914465	0.153007	-0.152093
	377	0.000952436	0.15293	-0.151977
	378	0.000990407	0.152817	-0.151826
	379	0.00102838	0.152669	-0.15164
	380	0.00109166	0.154248	-0.153157
	381	0.0011328	0.153959	-0.152826
	382	0.00117077	0.153649	-0.152478
	383	0.0012119	0.153303	-0.152091
	384	0.00124987	0.152937	-0.151687
	385	0.00131632	0.14305	-0.141734
	386	0.00130367	0.143925	-0.142621
	387	0.0013448	0.143311	-0.141966
	388	0.00140809	0.142676	-0.141268
	389	0.00144606	0.143262	-0.141816
	390	0.00148719	0.142557	-0.141069
	391	0.00155048	0.141851	-0.140301
	392	0.00159161	0.142183	-0.140591
	393	0.00163275	0.141421	-0.139789
	394	0.0016992	0.14066	-0.13896
	395	0.00174033	0.140758	-0.139018
	396	0.00180994	0.139947	-0.138138
	397	0.00185108	0.139877	-0.138026
	398	0.00192386	0.139024	-0.1371
	399	0.00196499	0.138833	-0.136868
	400	0.00204093	0.137973	-0.135932
	401	0.00211371	0.13767	-0.135556
	402	0.00215801	0.137282	-0.135124
	403	0.00223395	0.136379	-0.134145
	404	0.00230989	0.135886	-0.133576
	405	0.002389	0.134976	-0.132587
	406	0.00246811	0.134391	-0.131923
	407	0.00189538	0.133728	-0.131833
	408	0.00197448	0.132522	-0.130548
	409	0.00202195	0.131591	-0.129569
	410	0.00210105	0.130738	-0.128637
	411	0.00218332	0.129814	-0.127631
	412	0.00226559	0.12882	-0.126554
	413	0.00234786	0.127762	-0.125414
	414	0.00243013	0.126796	-0.124366
	415	0.00251557	0.125675	-0.123159
	416	0.002601	0.12449	-0.121889
	417	0.0026896	0.123256	-0.120567
	418	0.00277504	0.121966	-0.119191
	419	0.00283832	0.120978	-0.11814
	420	0.0262758	0.119639	-0.0933628
	421	0.0263201	0.118249	-0.0919293
	422	0.0263676	0.117269	-0.0909017
	423	0.0264119	0.115831	-0.0894189
	424	0.026453	0.126161	-0.0997084
	425	0.0264942	0.125562	-0.0990679
	426	0.0265353	0.124963	-0.0984274
	427	0.0265764	0.124363	-0.0977868
	428	0.0266144	0.123757	-0.0971424
	429	0.0266524	0.12315	-0.096498
	430	0.0266903	0.122544	-0.0958536
	431	0.0267252	0.121938	-0.0952124
	432	0.0267631	0.121331	-0.0945679
	433	0.0267948	0.120718	-0.0939228
	434	0.0268296	0.120104	-0.0932745
	435	0.0268612	0.119491	-0.0926294
	436	0.0268929	0.118877	-0.0919842
	437	0.0269213	0.118257	-0.0913352
	438	0.0269498	0.117636	-0.0906862
	439	0.0269783	0.117015	-0.0900371
	440	0.0270068	0.116395	-0.0893881
	441	0.0270321	0.115774	-0.0887423
	442	0.0270574	0.115147	-0.0880893
	443	0.0270795	0.114519	-0.0874396
	444	0.0271049	0.113892	-0.0867867
	445	0.027127	0.113264	-0.0861369
	446	0.027146	0.112636	-0.0854904
	447	0.027165	0.112009	-0.0848438
	448	0.027184	0.111374	-0.0841901
	449	0.027203	0.110747	-0.0835435
	450	0.0272188	0.110112	-0.0828931
	451	0.0272346	0.109477	-0.0822426
	452	0.0272504	0.10885	-0.0815992
	453	0.0272662	0.108215	-0.0809487
	454	0.027184	0.102595	-0.0754108
A455E	455	0.0269941	0.0873561	-0.060362
	456	0.0271492	0.0873138	-0.0601646
	457	0.0275162	0.0973413	-0.0698251
	458	0.0279877	0.107806	-0.0798183
	459	0.028282	0.108356	-0.080074
	460	0.0285731	0.108913	-0.08034
	461	0.0288673	0.109463	-0.0805958
	462	0.0291585	0.11002	-0.0808617
	463	0.0294496	0.0716943	-0.0422448
	464	0.00665123	0.0710526	-0.0644014
	465	0.00676831	0.0704109	-0.0636426
	466	0.00687273	0.0697763	-0.0629036
	467	0.00697714	0.0691416	-0.0621645
	468	0.0070784	0.068514	-0.0614356
	469	0.00727775	0.0657075	-0.0584297
M470V	470	0.00757835	0.0626964	-0.0551181
	471	0.00754987	0.0622028	-0.0546529
	472	0.00722712	0.0641702	-0.0569431
	473	0.0069898	0.0659895	-0.0589997
	474	0.00683475	0.0656299	-0.0587952
	475	0.00667654	0.0652703	-0.0585937
	476	0.00651833	0.0649177	-0.0583994
	477	0.00636012	0.0645581	-0.0581979
	478	0.00620507	0.0641984	-0.0579933
	479	0.00605002	0.0638458	-0.0577958
	480	0.00589498	0.0634862	-0.0575912
	481	0.00573044	0.0631266	-0.0573961
	482	0.00557855	0.130653	-0.125075
	483	0.0837574	0.129462	-0.0457043
	484	0.0825518	0.128213	-0.0456617
	485	0.0812671	0.126909	-0.0456418
	486	0.0799065	0.125548	-0.0456415
	487	0.0784668	0.124131	-0.0456638
	488	0.0769384	0.122657	-0.0457183
	489	0.0753247	0.121155	-0.0458301
	490	0.0736287	0.11966	-0.0460312
	491	0.0690595	0.0821097	-0.0130502
S492F	492	0.0615223	0	0.0615223
	493	0.0635569	0	0.0635569
	494	0.0715846	0.0569352	0.0146494
	495	0.0824885	0.125287	-0.0427985
	496	0.0881842	0.129314	-0.0411294
	497	0.0937595	0.13334	-0.0395805
	498	0.104091	0.137275	-0.0331841
	499	0.109347	0.150363	-0.0410162
	500	0.114454	0.15398	-0.0395266
	501	0.239568	0.167407	0.0721609
	502	0.120472	0.294943	-0.174471
	503	0.120991	0.309237	-0.188246
	504	0.121529	0.0470276	0.0745013
	505	0.122095	0.0463295	0.0757658
	506	0.118143	0.0491995	0.0689436
I507Del	507	0.109584	0.0589238	0.0506601
F508Del	508	0.293135	0.508433	-0.215298
	509	0.294078	0.509279	-0.215201
	510	0.28767	0.429637	-0.141967
	511	0.277649	0.03944	0.238209
	512	0.184029	0.037938	0.146091
	513	0.197977	0.036443	0.161534
	514	0.21195	0.0351596	0.176791
	515	0.225914	0.0336788	0.192235
	516	0.239878	0.032205	0.207673
	517	0.253832	0.0307382	0.223094
	518	0.267764	0.0292926	0.238472
	519	0.287363	0.0211691	0.266194
V520F	520	0.312718	0.000225653	0.312493
	521	0.318303	0	0.318303
	522	0.311276	0.0124603	0.298815
	523	0.298059	0.0259149	0.272144
	524	0.295322	0.0261123	0.269209
	525	0.29255	0.0263168	0.266233
	526	0.289768	0.0254847	0.264284
	527	0.28699	0.0256751	0.261315
	528	0.284215	0.0258867	0.258328
	529	0.279143	0.0261123	0.25303
	530	0.276491	0.0253719	0.251119
	531	0.273824	0.0255905	0.248233
	532	0.271153	0.0249136	0.246239
	533	0.265619	0.0251392	0.24048
	534	0.263059	0.0245116	0.238547
	535	0.257205	0.0239334	0.233272
	536	0.000224661	0.151985	-0.15176
	537	0.000199347	0.150687	-0.150488
	538	0.000177197	0.141992	-0.141815
	539	0.000155048	0.133347	-0.133192
	540	0.000139226	0.131923	-0.131783
	541	0.00012657	0.12327	-0.123144
	542	0.000117077	0.121733	-0.121616
	543	0.000107584	0.12016	-0.120053
	544	0.00010442	0.0422818	-0.0421774
	545	0.000101256	0.0415696	-0.0414683
	546	0.00010442	0.0408574	-0.040753
	547	0.000107584	0.0401311	-0.0400235
	548	4.42993e-05	0.0174106	-0.0173663
S549N	549	0	0	0
	550	5.3792e-05	0	5.3792e-05
G551D	551	0	0.309611	-0.309611
	552	1.2657e-05	0.309018	-0.309006
	553	2.53139e-05	0.265319	-0.265294
	554	3.79709e-05	0.0704321	-0.0703941
	555	5.69563e-05	0.0680627	-0.0680058
	556	0.145128	0.0656581	0.0794697
	557	0.14147	0.0218813	0.119589
L558S	558	0.136682	0.0254424	0.11124
A559T	559	0.0710087	0.20368	-0.132672
R560T	560	0.0691766	0.202383	-0.133206
	561	0.215064	0.00112122	0.213943
	562	0.19342	0.00996401	0.183456
	563	0.174448	0.023059	0.151389
	564	0.162139	0.0230237	0.139115
	565	0.149583	0.0230942	0.126489
	566	0.136825	0.0232635	0.113561
	567	0.123912	0.0206826	0.103229
	568	0.106287	0.0154925	0.0907942
Y569D	569	0.0837827	0	0.0837827
	570	0.0772454	0.000839149	0.0764062
	571	0.0810361	0.0127212	0.0683149
	572	0.0897758	0.0250969	0.0646789
	573	4.42993e-05	0.0267047	-0.0266604
	574	7.9106e-05	0.0310979	-0.0310188
	575	3.79709e-05	0.109823	-0.109785
G576A	576	0	0.0793666	-0.0793666
	577	6.32848e-05	0.0774979	-0.0774346
	578	0.00039553	0.0955008	-0.0951053
D579G	579	0.026279	0.153212	-0.126933
	580	0.0267346	0.154516	-0.127782
	581	0.0265701	0.134779	-0.108208
	582	0.0261018	0.114124	-0.0880225
	583	0.0261524	0.114188	-0.0880353
	584	0.0261999	0.114244	-0.0880442
	585	0.0262505	0.114301	-0.08805
	586	0.0263011	0.114364	-0.0880629
	587	0.0263549	0.11442	-0.0880655
	588	0.0264056	0.114477	-0.0880713
	589	0.0264594	0.106924	-0.0804651
	590	0.0265132	0.106163	-0.0796498
	591	0.0265701	0.103272	-0.0767016
	592	0.0266271	0.102545	-0.0759183
	593	0.0265037	0.101812	-0.0753084
	594	0.0265669	0.101079	-0.0745117
	595	0.0266302	0.100345	-0.0737151
	596	0.0266935	0.0995978	-0.0729043
	597	0.00575891	0.0988574	-0.0930985
	598	0.0528143	0.0981099	-0.0452956
	599	0.0529535	0.0955713	-0.0426178
	600	0.0530928	0.094845	-0.0417522
	601	0.053232	0.178598	-0.125366
	602	0.0533712	0.178541	-0.12517
	603	0.0535104	0.178478	-0.124967
	604	0.0536465	0.178414	-0.124768
	605	0.0537826	0.178344	-0.124561
	606	0.0539186	0.178266	-0.124348
	607	0.0540547	0.178189	-0.124134
	608	0.0541876	0.178104	-0.123916
	609	0.0543205	0.178012	-0.123692
	610	0.0544534	0.177921	-0.123467
	611	0.0545863	0.177815	-0.123229
	612	0.0547192	0.177716	-0.122997
	613	0.0549217	0.171313	-0.116392
D614G	614	0.0550831	0.165185	-0.110102
	615	0.055159	0.165439	-0.11028
	616	0.0551527	0.172047	-0.116894
	617	0.055102	0.178936	-0.123834
	618	0.055121	0.17955	-0.124429
	619	0.05514	0.180156	-0.125016
	620	0.0551558	0.180763	-0.125607
	621	0.0551748	0.181362	-0.126187
	622	0.0551906	0.181961	-0.126771
	623	0.0555197	0.181059	-0.125539
	624	0.0555672	0.181595	-0.126027
	625	0.0556115	0.182131	-0.126519
	626	0.0556589	0.182659	-0.127001
	627	0.0557032	0.183181	-0.127478
	628	0.0557475	0.183696	-0.127948
	629	0.0557918	0.184204	-0.128412
	630	0.055833	0.184711	-0.128879
	631	0.0558741	0.185212	-0.129338
	632	0.0559153	0.185699	-0.129783
	633	0.0559564	0.186185	-0.130229
	634	0.0559944	0.186665	-0.13067
	635	0.0560323	0.0644805	-0.00844816
	636	0.0560703	0.0636766	-0.0076063
	637	0.0169983	0.0628657	-0.0458674
	638	0.0172514	0.0620477	-0.0447962
	639	0.0175014	0.0612226	-0.0437212
	640	0.0177545	0.0603905	-0.042636
	641	0.0180045	0.0595514	-0.0415469
	642	0.0182545	0.0587052	-0.0404507
	643	0.0185013	0.0578449	-0.0393436
	644	0.0187481	0.0569846	-0.0382364
	645	0.0189949	0.0561172	-0.0371223
	646	0.0192417	0.0552428	-0.0360011
	647	0.0194885	0.0543613	-0.0348728
	648	0.0197322	0.0534658	-0.0337336
	649	0.0199758	0.0525702	-0.0325944
	650	0.0202195	0.0516676	-0.0314481
	651	0.0204631	0.0507579	-0.0302948
	652	0.0207036	0.0498412	-0.0291376
	653	0.0209441	0.0489245	-0.0279804
	654	0.0211846	0.0479937	-0.0268091
	655	0.0214251	0.0470558	-0.0256307
	656	0.0216624	0.0461109	-0.0244485
	657	0.0218997	0.045166	-0.0232663
	658	0.022137	0.044214	-0.022077
	659	0.0223743	0.0432479	-0.0208736
	660	0.0226085	0.0422818	-0.0196733
	661	0.0228458	0.0413087	-0.0184629
	662	0.02308	0.0403285	-0.0172486
	663	0.0233141	0.0393483	-0.0160342
	664	0.0235451	0.038354	-0.0148089
	665	0.0237792	0.0373598	-0.0135805
	666	0.0240102	0.0363584	-0.0123482
	667	0.0242096	0.0273746	-0.003165
R668C	668	0.0244248	0.0187363	0.00568846
	669	0.0246779	0.0182004	0.00647753
	670	0.0249722	0.0257315	-0.000759383
	671	0.0252791	0.0336153	-0.00833622
	672	0.0255576	0.0335378	-0.0079802
	673	0.0258328	0.0384246	-0.0125917
	674	0.0261081	0.0384951	-0.0123869
	675	0.0263834	0.0385585	-0.0121751
	676	0.0266587	0.038615	-0.0119562
	677	0.0269308	0.0386714	-0.0117405
	678	0.0272061	0.0387137	-0.0115076
	679	0.0274782	0.038756	-0.0112777
	680	0.0277504	0.0387842	-0.0110338
	681	0.0280225	0.0388124	-0.0107899
	682	0.0282915	0.0388336	-0.0105421
	683	0.0285636	0.0388477	-0.0102841
	684	0.0288325	0.0388618	-0.0100292
	685	0.0291015	0.0388618	-0.00976026
	686	0.0293705	0.0385092	-0.00913872
	687	0.0296394	0.0385021	-0.00886271
	688	0.0300318	0.0384951	-0.00846329
	689	0.0303007	0.038481	-0.00818023
	690	0.0305665	0.0384598	-0.00789328
	691	0.0308323	0.0384316	-0.00759927
	692	0.0311108	0.0349551	-0.00384435
	693	0.0313766	0.0348705	-0.00349393
	694	0.0316424	0.0347859	-0.00314352
	695	0.031905	0.0346872	-0.00278216
	696	0.0321708	0.0345884	-0.00241764
	697	0.0324334	0.0344897	-0.00205629
	698	0.0326961	0.0343769	-0.00168083
	699	0.0330853	0.0340878	-0.00100251
	700	0.0333479	0.033975	-0.000627049
	701	0.0336074	0.0338551	-0.000247703
	702	0.03387	0.0337352	0.000134807
	703	0.0341295	0.0336083	0.000521205
	704	0.0343889	0.0334813	0.000907603
	705	0.0346516	0.0326774	0.00197412
	706	0.0350218	0.0325294	0.00249243
	707	0.0352813	0.0323883	0.00289293
	708	0.0355502	0.0321556	0.00339459
	709	0.0358097	0.0320005	0.0038092
	710	0.0360597	0.0314787	0.00458099
	711	0.036316	0.0313165	0.00499949
	712	0.0365723	0.0311543	0.00541798
	713	0.0369488	0.030978	0.00597081
	714	0.0372051	0.0308088	0.00639636
	715	0.0374583	0.0306254	0.00683284
	716	0.0377146	0.0304491	0.00726544
	717	0.0379709	0.0302658	0.00770508
	718	0.038224	0.0300754	0.00814862
	719	0.038474	0.0351173	0.00335665
	720	0.0387271	0.0349269	0.00380018
	721	0.0390878	0.0347365	0.0043513
	722	0.039341	0.0345391	0.00480188
	723	0.0395941	0.0343346	0.00525952
	724	0.0398473	0.0342006	0.00564664
	725	0.0401004	0.0339891	0.00611133
	726	0.0403535	0.0337705	0.00658307
	727	0.0406067	0.0335448	0.00706187
	728	0.0408566	0.0333121	0.00754455
	729	0.0411098	0.0330794	0.00803039
	730	0.0413598	0.0328396	0.00852012
	731	0.0416129	0.0325928	0.00902007
	732	0.0419546	0.032339	0.00961567
	733	0.0422046	0.0320922	0.0101124
	734	0.0424546	0.0318524	0.0106022
	735	0.0427046	0.0316126	0.0110919
	736	0.0429545	0.0315351	0.0114195
	737	0.0432045	0.0313024	0.0119021
	738	0.0434545	0.0310697	0.0123848
	739	0.0437013	0.030837	0.0128643
	740	0.0439513	0.0306184	0.0133329
	741	0.0441981	0.0303927	0.0138054
	742	0.0444481	0.0301812	0.0142669
	743	0.0446949	0.0299696	0.0147253
	744	0.0449448	0.0297651	0.0151797
	745	0.0451916	0.0295677	0.015624
	746	0.0454385	0.0293702	0.0160682
	747	0.0456853	0.0291798	0.0165055
	748	0.0459321	0.0289965	0.0169356
	749	0.0461789	0.0288131	0.0173658
	750	0.0464257	0.0286368	0.0177889
	751	0.0466693	0.0284747	0.0181947
	752	0.046913	0.0283125	0.0186005
	753	0.0474699	0.013652	0.0338179
V754M	754	0.0478464	0	0.0478464
	755	0.0478559	0.000366687	0.0474892
	756	0.047492	0.015831	0.031661
	757	0.046951	0.0319441	0.0150069
	758	0.0467231	0.0335589	0.0131642
	759	0.0464922	0.0351808	0.0113114
	760	0.0462612	0.0367745	0.00948669
	761	0.0460302	0.0383258	0.00770434
	762	0.0457992	0.0398349	0.00596429
	763	0.0455682	0.0413087	0.0042595
	764	0.0453372	0.0427402	0.00259702
	765	0.0451062	0.0441364	0.000969801
	766	0.0448752	0.0454903	-0.000615109
	767	0.0446411	0.0468019	-0.00216087
	768	0.0444101	0.0480853	-0.00367527
	769	0.0441759	0.0493546	-0.00517872
	770	0.0439449	0.0506169	-0.00667196
	771	0.0437108	0.0518791	-0.00816836
	772	0.0434798	0.0531343	-0.00965455
	773	0.0432456	0.0543754	-0.0111298
	774	0.0430115	0.0556165	-0.012605
	775	0.0427805	0.0568506	-0.0140701
	776	0.0425463	0.0580776	-0.0155312
	777	0.0423122	0.0592975	-0.0169853
	778	0.042078	0.0605104	-0.0184324
	779	0.0418439	0.0617092	-0.0198653
	780	0.0416097	0.062908	-0.0212982
	781	0.0413756	0.0640997	-0.0227241
	782	0.0411414	0.0652773	-0.0241359
	783	0.0409073	0.066455	-0.0255477
	784	0.0406731	0.0676185	-0.0269454
	785	0.040439	0.068775	-0.028336
	786	0.0402048	0.0699244	-0.0297196
	787	0.0399707	0.0710738	-0.0311031
	788	0.0397365	0.0722232	-0.0324867
	789	0.0395023	0.0733797	-0.0338773
	790	0.039265	0.0745362	-0.0352711
	791	0.0390309	0.0756997	-0.0366688
	792	0.0387967	0.0768632	-0.0380665
	793	0.0385626	0.0780338	-0.0394712
	794	0.0383253	0.0791973	-0.0408721
	795	0.0381417	0.080375	-0.0422332
	796	0.0379076	0.0815455	-0.043638
	797	0.0376703	0.0827232	-0.0450529
	798	0.0374361	0.0839078	-0.0464717
	799	0.0371988	0.0850855	-0.0478867
	800	0.0369646	0.0862702	-0.0493055
	801	0.0367273	0.0874548	-0.0507275
	802	0.0364932	0.0886395	-0.0521464
	803	0.0362558	0.0898312	-0.0535754
	804	0.0360217	0.091023	-0.0550013
	805	0.0357844	0.107665	-0.0718806
	806	0.0355502	0.108363	-0.0728128
	807	0.0356356	0.109089	-0.0734537
	808	0.0354015	0.109844	-0.0744424
	809	0.0351673	0.111148	-0.0759811
	810	0.0349332	0.112453	-0.0775198
	811	0.034699	0.113751	-0.0790515
	812	0.0344649	0.115055	-0.0805902
	813	0.0342307	0.11636	-0.0821289
	814	0.0339966	0.117657	-0.0836606
	815	0.0337624	0.118955	-0.0851922
	816	0.0335283	0.120252	-0.0867239
	817	0.0332941	0.12155	-0.0882556
	818	0.03306	0.12284	-0.0897802
	819	0.0328258	0.124131	-0.0913048
	820	0.0326613	0.125421	-0.0927598
	821	0.0324271	0.126711	-0.0942844
	822	0.0321898	0.127995	-0.0958051
	823	0.0319556	0.129278	-0.0973227
	824	0.0317215	0.130562	-0.0988402
	825	0.0314842	0.131838	-0.100354
	826	0.03125	0.133121	-0.101871
	827	0.0310159	0.134391	-0.103375
	828	0.0307785	0.135667	-0.104889
	829	0.0305444	0.136936	-0.106392
	830	0.0303071	0.138199	-0.107892
	831	0.0300729	0.139468	-0.109395
	832	0.0298356	0.140723	-0.110888
	833	0.0296014	0.141985	-0.112384
	834	0.0293641	0.143241	-0.113876
	835	0.02913	0.144489	-0.115359
	836	0.0288927	0.145737	-0.116844
	837	0.0286585	0.146985	-0.118327
	838	0.0284212	0.148226	-0.119805
	839	0.028187	0.149467	-0.12128
	840	0.028013	0.150701	-0.122688
	841	0.0277788	0.151928	-0.124149
	842	0.0275415	0.153155	-0.125614
	843	0.0273074	0.154375	-0.127068
	844	0.0270701	0.155595	-0.128525
	845	0.0268359	0.156815	-0.129979
	846	0.0265986	0.158021	-0.131422
	847	0.0263644	0.159227	-0.132862
	848	0.0261271	0.160433	-0.134305
	849	0.025893	0.161631	-0.135738
	850	0.0256556	0.162823	-0.137167
	851	0.0254215	0.164001	-0.138579
	852	0.0251873	0.16515	-0.139963
	853	0.02495	0.165143	-0.140193
	854	0.0247159	0.166236	-0.14152
	855	0.0244817	0.167301	-0.142819
	856	0.0242444	0.155285	-0.13104
	857	0.0240102	0.156202	-0.132191
	858	0.0237761	0.15709	-0.133314
	859	0.0235419	0.156907	-0.133365
	860	0.0233078	0.157739	-0.134431
	861	0.0230736	0.158543	-0.135469
	862	0.0228395	0.159333	-0.136493
	863	0.0226085	0.160094	-0.137486
	864	0.0223743	0.160842	-0.138467
	865	0.0221433	0.161568	-0.139425
	866	0.0219092	0.16228	-0.140371
	867	0.0216782	0.162978	-0.1413
	868	0.021444	0.163655	-0.142211
	869	0.0212131	0.164311	-0.143098
	870	0.0208713	0.167865	-0.146994
	871	0.0206403	0.167498	-0.146858
	872	0.0204093	0.168091	-0.147681
	873	0.0201815	0.300429	-0.280248
	874	0.0199505	0.301826	-0.281875
	875	0.0197227	0.303229	-0.283506
	876	0.0194949	0.304625	-0.28513
	877	0.019267	0.306014	-0.286747
	878	0.0190392	0.307404	-0.288364
	879	0.0188114	0.308793	-0.289981
	880	0.0185836	0.310175	-0.291591
	881	0.0183589	0.311557	-0.293198
	882	0.0181311	0.312932	-0.294801
	883	0.0179064	0.314307	-0.296401
	884	0.0176818	0.315675	-0.297993
	885	0.0174571	0.317043	-0.299586
	886	0.0172356	0.318404	-0.301169
	887	0.0170109	0.319758	-0.302747
	888	0.0167894	0.321105	-0.304315
	889	0.016568	0.322452	-0.305884
	890	0.0167293	0.323792	-0.307062
	891	0.0165047	0.325131	-0.308627
	892	0.0162832	0.326457	-0.310174
	893	0.0160617	0.327783	-0.311721
	894	0.0375595	0.329102	-0.291542
	895	0.0375848	0.33042	-0.292835
	896	0.0376133	0.331725	-0.294111
	897	0.0376418	0.333022	-0.29538
	898	0.0376734	0.33432	-0.296646
	899	0.0377019	0.335603	-0.297901
	900	0.0377304	0.336887	-0.299156
	901	0.0377842	0.338163	-0.300379
	902	0.0378158	0.339425	-0.301609
	903	0.0378443	0.340687	-0.302843
	904	0.0378759	0.341936	-0.30406
	905	0.0379076	0.343184	-0.305276
	906	0.0392555	0.347126	-0.30787
	907	0.0392524	0.348317	-0.309065
	908	0.0392492	0.349488	-0.310239
	909	0.039246	0.350658	-0.311412
	910	0.0392429	0.351822	-0.312579
	911	0.0392682	0.352971	-0.313703
	912	0.0392682	0.354107	-0.314839
	913	0.039265	0.355242	-0.315977
	914	0.039265	0.356363	-0.317098
	915	0.039265	0.357477	-0.318212
	916	0.039265	0.358578	-0.319312
	917	0.039265	0.359671	-0.320405
	918	0.0392682	0.360749	-0.321481
	919	0.0392682	0.361821	-0.322553
	920	0.0392714	0.362886	-0.323615
	921	0.0392714	0.36393	-0.324658
	922	0.0392745	0.364973	-0.325699
	923	0.039303	0.365996	-0.326693
	924	0.0393062	0.367011	-0.327705
	925	0.0393125	0.36802	-0.328707
	926	0.0393157	0.369014	-0.329698
	927	0.039322	0.369994	-0.330672
	928	0.0393283	0.37096	-0.331632
	929	0.0393315	0.371919	-0.332588
	930	0.0393378	0.372857	-0.333519
	931	0.0393473	0.373788	-0.334441
	932	0.0393536	0.374712	-0.335358
	933	0.03936	0.375614	-0.336254
	934	0.0393695	0.376503	-0.337133
	935	0.0393789	0.377384	-0.338005
	936	0.0393853	0.378252	-0.338866
	937	0.0393948	0.379098	-0.339703
	938	0.0394043	0.379937	-0.340533
	939	0.0394137	0.380755	-0.341341
	940	0.0390151	0.3861	-0.347085
	941	0.0390942	0.3867	-0.347605
	942	0.0391764	0.387285	-0.348108
	943	0.0392524	0.387842	-0.34859
	944	0.0395909	0.40796	-0.368369
S945L	945	0.0397745	0.42719	-0.387416
	946	0.0396511	0.426534	-0.386883
	947	0.0390467	0.395965	-0.356919
	948	0.0385816	0.384274	-0.345692
	949	0.0382556	0.382398	-0.344142
	950	0.0379266	0.380501	-0.342575
	951	0.0376006	0.37859	-0.34099
	952	0.0372716	0.376658	-0.339386
	953	0.0369456	0.374712	-0.337766
	954	0.0366166	0.191855	-0.155238
	955	0.0362906	0.185254	-0.148964
	956	0.0359616	0.178302	-0.14234
	957	0.00342054	0.178605	-0.175184
	958	0.00291743	0.171038	-0.168121
	959	0.00272441	0.171017	-0.168293
	960	0.00252506	0.162865	-0.16034
	961	0.00231622	0.162471	-0.160154
	962	0.00210105	0.153825	-0.151724
	963	0.00186057	0.152986	-0.151125
	964	0.00163591	0.156018	-0.154382
	965	0.00140492	0.14647	-0.145065
	966	0.000952436	0.104259	-0.103307
S967L	967	0	0	0
	968	0	0	0
	969	0.00108533	0.379725	-0.37864
G970R	970	0.000193019	0.414688	-0.414495
	971	0.000275289	0.41693	-0.416655
	972	0.00140492	0.386227	-0.384822
	973	0.00214852	0.342338	-0.340189
	974	0.0158338	0.347767	-0.331933
	975	0.0165869	0.353282	-0.336695
	976	0.018302	0.41961	-0.401308
S977F	977	0.0195107	0.483378	-0.463867
	978	0.0196278	0.485578	-0.46595
	979	0.018014	0.395373	-0.377359
	980	0.0169603	0.363782	-0.346821
	981	0.0164256	0.362653	-0.346228
	982	0.015913	0.361603	-0.34569
	983	0.0154225	0.360622	-0.3452
	984	0.0149542	0.35972	-0.344766
	985	0.014508	0.358888	-0.34438
	986	0.0140777	0.358126	-0.344049
	987	0.0136695	0.36228	-0.34861
	988	0.0126063	0.361567	-0.348961
	989	0.0125272	0.360905	-0.348377
	990	0.0124513	0.360298	-0.347847
	991	0.0123753	0.359748	-0.347373
	992	0.0124766	0.37175	-0.359273
	993	0.0124006	0.372378	-0.359977
	994	0.0123247	0.372991	-0.360666
	995	0.0122488	0.373576	-0.361328
	996	0.0121981	0.394414	-0.382216
	997	0.012002	0.454833	-0.442831
	998	0.0118944	0.453112	-0.441218
	999	0.0118596	0.38878	-0.37692
	1000	0.0116887	0.364268	-0.35258
	1001	0.0113786	0.360235	-0.348856
	1002	0.0112394	0.35618	-0.344941
	1003	0.011097	0.352139	-0.341042
	1004	0.0109578	0.348106	-0.337148
	1005	0.0108185	0.344093	-0.333275
	1006	0.0106793	0.340109	-0.32943
	1007	0.0105432	0.334898	-0.324355
	1008	0.0104072	0.33102	-0.320612
	1009	0.0102743	0.327162	-0.316888
	1010	0.0101414	0.323326	-0.313185
	1011	0.0100085	0.318094	-0.308085
	1012	0.00972687	0.197144	-0.187417
	1013	0.00192386	0.193611	-0.191687
	1014	0.00181311	0.190014	-0.188201
	1015	0.00170236	0.186369	-0.184666
	1016	0.00158845	0.182667	-0.181078
	1017	0.0014777	0.178915	-0.177437
	1018	0.00136379	0.175114	-0.17375
	1019	0.00116444	0.171264	-0.1701
	1020	0.00105053	0.167371	-0.166321
	1021	0.000936614	0.164156	-0.163219
	1022	0.000822702	0.160186	-0.159363
	1023	0.000708789	0.15618	-0.155472
	1024	0.000594877	0.15214	-0.151545
	1025	0.000480964	0.148092	-0.147611
	1026	0.000167705	0.0727027	-0.072535
I1027T	1027	0	0.000366687	-0.000366687
	1028	9.49271e-06	0.000401945	-0.000392453
	1029	0.000436665	0.109682	-0.109245
	1030	0.000743596	0.149721	-0.148977
	1031	0.000939779	0.15386	-0.152921
	1032	0.00113913	0.157986	-0.156847
	1033	0.00133847	0.162083	-0.160744
	1034	0.00153466	0.166137	-0.164603
	1035	0.001734	0.170143	-0.168409
	1036	0.00193019	0.174099	-0.172169
	1037	0.00212637	0.180516	-0.178389
	1038	0.00232255	0.184352	-0.182029
	1039	0.00250291	0.188153	-0.18565
	1040	0.0026991	0.191904	-0.189205
	1041	0.00289528	0.195606	-0.192711
	1042	0.00309146	0.199266	-0.196175
	1043	0.00328448	0.205874	-0.202589
	1044	0.00347433	0.209435	-0.20596
	1045	0.00366735	0.21296	-0.209293
	1046	0.00386353	0.216444	-0.21258
	1047	0.00405655	0.219885	-0.215829
	1048	0.00425274	0.223284	-0.219031
	1049	0.00444575	0.226641	-0.222195
	1050	0.00463877	0.229941	-0.225302
	1051	0.00493938	0.234778	-0.229839
F1052V	1052	0.00517669	0.239496	-0.234319
	1053	0.00527795	0.242549	-0.237271
	1054	0.00517037	0.24312	-0.23795
	1055	0.0051229	0.245158	-0.240036
	1056	0.00513556	0.247937	-0.242801
	1057	0.00514822	0.254445	-0.249297
	1058	0.00514505	0.257189	-0.252044
	1059	0.00516087	0.263796	-0.258635
	1060	0.00515138	0.266518	-0.261367
	1061	0.261572	0.273161	-0.0115889
	1062	0.262065	0.275875	-0.0138101
	1063	0.262556	0.278513	-0.015957
	1064	0.263632	0.310527	-0.0468958
L1065P	1065	0.264356	0.322445	-0.0580885
R1066H	1066	3.48066e-05	0.297877	-0.297842
	1067	0	0.297877	-0.297877
	1068	0.00529377	0.339369	-0.334075
G1069R	1069	0.0053444	0.380177	-0.374832
R1070W	1070	1.58212e-05	0.441547	-0.441532
	1071	0	0.440927	-0.440927
	1072	0.000129734	0.296889	-0.29676
	1073	0.000101256	0.294626	-0.294525
	1074	0.110096	0.292334	-0.182238
	1075	0.109875	0.290014	-0.180139
	1076	0.109546	0.191791	-0.0822454
L1077P	1077	0.108103	0.184563	-0.0764604
	1078	0.10904	0.183611	-0.0745718
	1079	0.109622	0.193604	-0.0839818
	1080	0.109764	0.193653	-0.0838888
	1081	0.109907	0.358105	-0.248198
	1082	0.109078	0.354946	-0.245868
	1083	0.109223	0.351815	-0.242592
	1084	0.109366	0.348663	-0.239297
	1085	0.109508	0.345511	-0.236003
	1086	0.0449733	0.342359	-0.297385
	1087	0.0444291	0.339207	-0.294777
	1088	0.043888	0.336062	-0.292174
	1089	0.0433469	0.332916	-0.28957
	1090	0.0428058	0.329778	-0.286973
	1091	0.0422647	0.32664	-0.284376
	1092	0.0417236	0.32351	-0.281786
	1093	0.0411826	0.320379	-0.279196
	1094	0.0406415	0.317248	-0.276606
	1095	0.0401036	0.314131	-0.274027
	1096	0.0395625	0.311014	-0.271452
	1097	0.0390277	0.307904	-0.268876
	1098	0.038493	0.304809	-0.266316
	1099	0.0379645	0.301734	-0.263769
	1100	0.0372273	0.29055	-0.253323
M1101K	1101	0.0357496	0.26357	-0.227821
	1102	0.0360565	0.261405	-0.225349
	1103	0.0371165	0.292778	-0.255662
	1104	0.0373095	0.291608	-0.254298
	1105	0.0375152	0.29048	-0.252964
	1106	0.037724	0.289358	-0.251634
	1107	0.0379392	0.288258	-0.250319
	1108	0.0381512	0.287158	-0.249007
	1109	0.0383664	0.286065	-0.247699
	1110	0.0385816	0.284986	-0.246405
	1111	0.0387967	0.283907	-0.245111
	1112	0.0390119	0.282835	-0.243824
	1113	0.0392271	0.281764	-0.242537
	1114	0.0394422	0.280706	-0.241264
	1115	0.0396574	0.279648	-0.239991
	1116	0.0398726	0.278597	-0.238725
	1117	0.0400877	0.277547	-0.237459
	1118	0.0403061	0.27651	-0.236204
	1119	0.0405212	0.275474	-0.234952
	1120	0.0407364	0.123693	-0.082957
	1121	0.0409516	0.120725	-0.079773
	1122	0.0411667	0.114914	-0.0737473
	1123	0.00148086	0.112009	-0.110528
	1124	0.00142074	0.109125	-0.107704
	1125	0.00137012	0.10361	-0.10224
	1126	0.00130999	0.10079	-0.0994795
	1127	0.00125304	0.0979759	-0.0967229
	1128	0.00119608	0.0951835	-0.0939874
	1129	0.00114862	0.0900569	-0.0889083
	1130	0.00109166	0.087335	-0.0862433
	1131	0.00103471	0.0846271	-0.0835924
	1132	0.000980914	0.0819334	-0.0809525
	1133	0.000927122	0.0792608	-0.0783337
	1134	0.00087333	0.0746278	-0.0737545
	1135	0.000819538	0.0720399	-0.0712203
	1136	0.000765746	0.069466	-0.0687003
	1137	0.000727775	0.0669133	-0.0661855
	1138	0.000677147	0.0643818	-0.0637046
	1139	0.000626519	0.0618714	-0.0612448
	1140	0.000575891	0.0593821	-0.0588062
	1141	0.000525264	0.0569211	-0.0563958
	1142	0.0004778	0.0544812	-0.0540034
	1143	0.000430336	0.0520695	-0.0516392
	1144	0.000382873	0.049679	-0.0492962
	1145	0.000335409	0.0473238	-0.0469884
	1146	0.00029111	0.0449826	-0.0446915
	1147	0.000243646	0.0426556	-0.0424119
	1148	0.000199347	0.0403356	-0.0401362
	1149	0.000158212	0.0380297	-0.0378715
	1150	0.000113913	0.0357379	-0.035624
	1151	5.69563e-05	0.0175516	-0.0174947
D1152H	1152	9.49271e-06	9.16717e-05	-8.2179e-05
	1153	0	0	0
	1154	0	0.0300613	-0.0300613
	1155	0	0.0287356	-0.0287356
	1156	3.16424e-06	0.0283125	-0.0283093
	1157	0	0.0271842	-0.0271842
	1158	9.49271e-06	0.0267258	-0.0267163
	1159	3.16424e-05	0.0257527	-0.0257211
	1160	2.21497e-05	0.0252591	-0.0252369
	1161	3.16424e-05	0.0122981	-0.0122665
R1162L	1162	0	7.05167e-06	-7.05167e-06
	1163	2.84781e-05	0.000162188	-0.00013371
	1164	6.32848e-05	0.0259854	-0.0259221
	1165	9.49271e-05	0.0269867	-0.0268918
	1166	0.000129734	0.0280092	-0.0278795
	1167	0.00016454	0.0290529	-0.0288883
	1168	0.000199347	0.0301036	-0.0299042
	1169	0.000237318	0.0311613	-0.030924
	1170	0.000272124	0.0322191	-0.031947
	1171	0.00031326	0.0332768	-0.0329636
	1172	0.00035123	0.0343416	-0.0339904
	1173	0.000392366	0.0353994	-0.035007
	1174	0.000433501	0.0364642	-0.0360307
	1175	0.000474636	0.0375219	-0.0370473
	1176	0.000518935	0.0385867	-0.0380678
	1177	0.000563234	0.0396445	-0.0390813
	1178	0.000607534	0.0407022	-0.0400947
	1179	0.000651833	0.04176	-0.0411082
	1180	0.000699297	0.0428107	-0.0421114
	1181	0.00074676	0.0438684	-0.0431217
	1182	0.000797388	0.0449191	-0.0441218
	1183	0.000844852	0.0459698	-0.045125
	1184	0.000895479	0.0470135	-0.046118
	1185	0.000949271	0.0480571	-0.0471079
	1186	0.000999899	0.0491008	-0.0481009
	1187	0.00105369	0.0501444	-0.0490907
	1188	0.00111065	0.051181	-0.0500704
	1189	0.00116444	0.0522176	-0.0510532
	1190	0.0012214	0.0532472	-0.0520258
	1191	0.00127835	0.0542767	-0.0529984
	1192	0.00133847	0.0553063	-0.0539678
	1193	0.00139859	0.0563358	-0.0549372
	1194	0.00146188	0.0573583	-0.0558964
	1195	0.001522	0.0583737	-0.0568517
	1196	0.00158845	0.0593962	-0.0578078
	1197	0.00165173	0.0604117	-0.0587599
	1198	0.00171818	0.0614201	-0.0597019
	1199	0.00178463	0.0624355	-0.0606509
	1200	0.00185424	0.0634439	-0.0615896
	1201	0.00181627	0.0644452	-0.062629
	1202	0.00188589	0.0654536	-0.0635677
	1203	0.0019555	0.066455	-0.0644995
	1204	0.00202511	0.0671037	-0.0650786
	1205	0.00209789	0.0680345	-0.0659366
	1206	0.00203777	0.0689442	-0.0669064
	1207	0.00210738	0.0698327	-0.0677253
	1208	0.00218016	0.0707001	-0.0685199
	1209	0.00225294	0.0715533	-0.0693004
	1210	0.00217067	0.0719623	-0.0697916
	1211	0.00224028	0.072745	-0.0705048
	1212	0.00152833	0.0735137	-0.0719853
	1213	0.00154098	0.0742682	-0.0727272
	1214	0.00155048	0.0749945	-0.0734441
	1215	0.00156313	0.0752131	-0.07365
	1216	0.00157263	0.075876	-0.0743034
	1217	0.00150934	0.0765177	-0.0750083
	1218	0.00151567	0.0771382	-0.0756226
	1219	0.001522	0.0771876	-0.0756656
	1220	0.00152833	0.0777306	-0.0762022
	1221	0.00153149	0.0782595	-0.076728
	1222	0.00153466	0.0787742	-0.0772396
	1223	0.00153782	0.0786261	-0.0770883
	1224	0.00154098	0.0790492	-0.0775083
	1225	0.00146188	0.0794582	-0.0779964
	1226	0.00145871	0.162188	-0.16073
	1227	0.00145555	0.163437	-0.161981
	1228	0.00145239	0.164699	-0.163246
	1229	0.00144606	0.165968	-0.164522
	1230	0.00143973	0.167244	-0.165805
	1231	0.00143024	0.168528	-0.167098
	1232	0.00142074	0.171116	-0.169695
	1233	0.00141125	0.172435	-0.171023
I1234V	1234	0.00129101	0.180135	-0.178844
S1235R	1235	0.00129417	0.183365	-0.18207
	1236	0.00133531	0.184451	-0.183115
	1237	0.00156313	0.0781466	-0.0765835
	1238	0.00166122	0.0780056	-0.0763444
	1239	0.00175615	0.0778857	-0.0761296
	1240	0.000939779	0.0768491	-0.0759093
	1241	0.000854344	0.0766446	-0.0757903
	1242	0.000762581	0.0764613	-0.0756987
	1243	0.000262632	0.0474436	-0.047181
G1244E	1244	0	0.0381002	-0.0381002
	1245	0.000401858	0.0491995	-0.0487977
	1246	0.000999899	0.0797403	-0.0787404
	1247	0.00124038	0.081743	-0.0805026
	1248	0.0108533	0.0837739	-0.0729205
	1249	0.0112267	0.113158	-0.101931
	1250	0.0122424	0.131316	-0.119074
S1251N	1251	0.0125399	0.137367	-0.124827
	1252	0.0126032	0.138615	-0.126012
	1253	0.0115874	0.118299	-0.106711
	1254	0.0113343	0.119194	-0.10786
	1255	0.0110875	0.120083	-0.108995
	1256	0.010847	0.119145	-0.108298
	1257	0.010616	0.120189	-0.109573
	1258	0.0100908	0.102997	-0.092906
	1259	0.00988508	0.10452	-0.0946348
	1260	0.000424008	0.106149	-0.105725
	1261	0.000234154	0.108271	-0.108037
	1262	0.000272124	0.110359	-0.110087
	1263	8.54344e-05	0.112495	-0.11241
	1264	0.000110748	0.114279	-0.114169
	1265	0.000132898	0.116437	-0.116304
	1266	0.000148719	0.118221	-0.118073
	1267	0.000161376	0.120379	-0.120218
	1268	0.000170869	0.12217	-0.121999
	1269	6.96132e-05	0.128799	-0.128729
D1270N	1270	0	0.132339	-0.132339
	1271	0.000167705	0.132064	-0.131896
	1272	0.00035123	0.128735	-0.128384
	1273	0.000442993	0.130195	-0.129752
	1274	0.000531592	0.131669	-0.131137
	1275	0.000617026	0.133143	-0.132526
	1276	0.000699297	0.134461	-0.133762
	1277	0.000778403	0.13597	-0.135192
	1278	0.00085118	0.137486	-0.136635
	1279	0.000923958	0.13901	-0.138086
	1280	0.000990407	0.14054	-0.139549
	1281	0.00105686	0.142049	-0.140992
	1282	0.00111698	0.143502	-0.142385
	1283	0.0011771	0.144989	-0.143812
	1284	0.00123089	0.146463	-0.145232
	1285	0.00147137	0.147916	-0.146444
	1286	0.00151883	0.149354	-0.147836
	1287	0.0427773	0.150779	-0.108002
	1288	0.0429229	0.152189	-0.109266
	1289	0.0430716	0.0578449	-0.0147733
	1290	0.0432203	0.0565967	-0.0133764
	1291	0.043369	0.0553415	-0.0119725
	1292	0.0435146	0.0540934	-0.0105788
	1293	0.0436633	0.0528382	-0.00917485
	1294	0.043812	0.051583	-0.00777094
	1295	0.0439608	0.0503278	-0.00636702
	1296	0.0441095	0.0490796	-0.00497016
	1297	0.0442582	0.0478244	-0.00356624
	1298	0.0444069	0.0465692	-0.00216232
	1299	0.0445556	0.0453211	-0.000765457
	1300	0.0447044	0.0440659	0.00063846
	1301	0.0448531	0.0428248	0.00202827
	1302	0.0450619	0.0104929	0.034569
N1303K	1303	0.0452011	0	0.0452011
	1304	0.0453182	0	0.0453182
	1305	0.0453309	0.042437	0.00289391
	1306	0.0454163	0.043671	0.00174531
	1307	0.0455017	0.0449191	0.000582595
	1308	0.0455872	0.0461673	-0.000580116
	1309	0.0456726	0.0474225	-0.00174988
	1310	0.045758	0.0486777	-0.00291964
	1311	0.0458435	0.0499329	-0.00408941
	1312	0.0459289	0.0511881	-0.00525917
	1313	0.0460144	0.0524362	-0.00642188
	1314	0.0460998	0.0536914	-0.00759164
	1315	0.0461852	0.0549466	-0.00876141
	1316	0.0462707	0.0561948	-0.00992412
	1317	0.0463561	0.05745	-0.0110939
	1318	0.0464415	0.0586981	-0.0122566
	1319	0.046527	0.0599533	-0.0134264
	1320	0.0466124	0.0612015	-0.0145891
	1321	0.0466978	0.0624496	-0.0157518
	1322	0.0467833	0.0636977	-0.0169145
	1323	0.0468687	0.0649388	-0.0180701
	1324	0.0469541	0.066187	-0.0192329
	1325	0.0470396	0.0674281	-0.0203885
	1326	0.047125	0.0686762	-0.0215512
	1327	0.0472104	0.0699173	-0.0227069
	1328	0.047299	0.0711584	-0.0238594
	1329	0.0473845	0.0723925	-0.025008
	1330	0.0474699	0.0736336	-0.0261637
	1331	0.0475553	0.0748676	-0.0273123
	1332	0.0476408	0.0761016	-0.0284609
	1333	0.0477262	0.0773357	-0.0296095
	1334	0.0478116	0.0785697	-0.0307581
	1335	0.0478971	0.0797967	-0.0318996
	1336	0.0479825	0.0810237	-0.0330412
	1337	0.0480679	0.0822507	-0.0341828
	1338	0.0481534	0.0834706	-0.0353173
	1339	0.0482388	0.0846976	-0.0364588
	1340	0.0483242	0.0859105	-0.0375863
	1341	0.0484097	0.0871305	-0.0387208
	1342	0.0484951	0.0883504	-0.0398553
	1343	0.0485805	0.0895633	-0.0409827
	1344	0.0484761	0.0907973	-0.0423212
	1345	0.0485584	0.0920032	-0.0434448
	1346	0.0486407	0.0932936	-0.0446529
	1347	0.0487229	0.0944924	-0.0457695
	1348	0.0488052	0.0978208	-0.0490156
	1349	0.0488875	0.0990478	-0.0501603
	1350	0.0489697	0.100275	-0.051305
	1351	0.049052	0.101495	-0.0524427
	1352	0.0491343	0.102715	-0.0535804
	1353	0.0492166	0.103928	-0.054711
	1354	0.0492957	0.10514	-0.0558448
	1355	0.0493779	0.106353	-0.0569754
	1356	0.0494602	0.107559	-0.0580989
	1357	0.0495425	0.108765	-0.0592225
	1358	0.0496247	0.109964	-0.060339
	1359	0.049707	0.111163	-0.0614555
	1360	0.0497893	0.112354	-0.062565
	1361	0.0498716	0.113546	-0.0636745
	1362	0.0496785	0.114738	-0.0650592
	1363	0.0497608	0.122368	-0.0726068
	1364	0.0498431	0.123616	-0.0737727
	1365	0.0499253	0.124857	-0.0749315
	1366	0.0500076	0.126098	-0.0760904
	1367	0.0500899	0.127332	-0.0772421
	1368	0.0501722	0.128559	-0.0783869
	1369	0.0502544	0.129786	-0.0795316
	1370	0.0503335	0.131013	-0.0806795
	1371	0.0504158	0.132233	-0.0818171
	1372	0.0504981	0.133446	-0.0829478
	1373	0.0505803	0.134652	-0.0840713
	1374	0.0506626	0.135858	-0.0851949
	1375	0.0507449	0.137063	-0.0863185
	1376	0.0508272	0.138262	-0.087435
	1377	0.0509063	0.139454	-0.0885476
	1378	0.0509885	0.140639	-0.08965
	1379	0.0510708	0.141823	-0.0907524
	1380	0.0511531	0.143001	-0.0918478
	1381	0.0512353	0.144178	-0.0929431
	1382	0.0513144	0.145349	-0.0940346
	1383	0.0513967	0.146513	-0.0951159
	1384	0.051479	0.147669	-0.0961901
	1385	0.0515613	0.148826	-0.0972643
	1386	0.0516435	0.149975	-0.0983314
	1387	0.0517226	0.151117	-0.0993947
	1388	0.0518049	0.15226	-0.100455
	1389	0.0518872	0.153395	-0.101508
	1390	0.0519663	0.154523	-0.102557
	1391	0.0517764	0.155644	-0.103868
	1392	0.0518587	0.156766	-0.104907
	1393	0.051941	0.157873	-0.105932
	1394	0.0520201	0.15898	-0.10696
	1395	0.0521023	0.160087	-0.107985
	1396	0.0521846	0.16118	-0.108995
	1397	0.0522637	0.162273	-0.110009
	1398	0.052346	0.163352	-0.111006
	1399	0.0524251	0.164431	-0.112006
	1400	0.0525074	0.165503	-0.112995
	1401	0.0525896	0.166575	-0.113985
	1402	0.0526687	0.167632	-0.114964
	1403	0.052751	0.16869	-0.115939
	1404	0.0528301	0.169734	-0.116904
	1405	0.0529124	0.170777	-0.117865
	1406	0.0529915	0.171814	-0.118822
	1407	0.0530706	0.172844	-0.119773
	1408	0.0531529	0.173866	-0.120713
	1409	0.053232	0.174881	-0.121649
	1410	0.0533142	0.17589	-0.122576
	1411	0.0531244	0.176898	-0.123774
	1412	0.0532067	0.177893	-0.124686
	1413	0.0532858	0.17888	-0.125594
	1414	0.0533649	0.179867	-0.126502
	1415	0.0534471	0.18084	-0.127393
	1416	0.0535263	0.181813	-0.128287
	1417	0.0536054	0.182772	-0.129167
	1418	0.0536876	0.183731	-0.130044
	1419	0.0537667	0.184683	-0.130917
	1420	0.0538458	0.185621	-0.131775
	1421	0.0539249	0.186559	-0.132634
	1422	0.0540041	0.187483	-0.133479
	1423	0.0540863	0.1884	-0.134313
	1424	0.0541654	0.189316	-0.135151
	1425	0.0542445	0.190219	-0.135974
	1426	0.0543236	0.191114	-0.136791
	1427	0.0541369	0.19201	-0.137873
	1428	0.0542161	0.192891	-0.138675
	1429	0.0542952	0.193766	-0.139471
	1430	0.0543743	0.194633	-0.140259
	1431	0.0544534	0.195493	-0.14104
	1432	0.0545356	0.19634	-0.141804
	1433	0.0546147	0.197186	-0.142571
	1434	0.0546939	0.198018	-0.143324
	1435	0.0547698	0.19885	-0.14408
	1436	0.0548489	0.199668	-0.144819
	1437	0.054928	0.200479	-0.145551
	1438	0.0550071	0.201283	-0.146276
	1439	0.0550862	0.202073	-0.146986
	1440	0.0549027	0.202862	-0.14796
	1441	0.0549818	0.203638	-0.148656
	1442	0.0550609	0.204407	-0.149346
	1443	0.05514	0.205168	-0.150028
	1444	0.055216	0.205916	-0.1507
	1445	0.0552951	0.206663	-0.151368
	1446	0.0553742	0.207397	-0.152023
	1447	0.0554533	0.208123	-0.15267
	1448	0.0555292	0.208835	-0.153306
	1449	0.0556083	0.209547	-0.153939
	1450	0.0556874	0.210246	-0.154558
	1451	0.0557634	0.210937	-0.155173
	1452	0.055583	0.211614	-0.156031
	1453	0.0556621	0.212291	-0.156628
	1454	0.0557381	0.212953	-0.157215
	1455	0.0558172	0.213602	-0.157785
	1456	0.0558963	0.214244	-0.158348
	1457	0.0559722	0.214879	-0.158906
	1458	0.0560513	0.215506	-0.159455
	1459	0.0561273	0.21612	-0.159992
	1460	0.0562064	0.216726	-0.16052
	1461	0.0562823	0.217325	-0.161043
	1462	0.0561019	0.217911	-0.161809
	1463	0.056181	0.218489	-0.162308
	1464	0.056257	0.219053	-0.162796
	1465	0.0563361	0.21961	-0.163274
	1466	0.056412	0.220153	-0.163741
	1467	0.0564911	0.220696	-0.164205
	1468	0.0565671	0.221218	-0.164651
	1469	0.056643	0.221733	-0.16509
	1470	0.0567221	0.22224	-0.165518
	1471	0.0565449	0.222741	-0.166196
	1472	0.0566209	0.223221	-0.1666
	1473	0.0566968	0.187151	-0.130455
	1474	0.0567759	0.187151	-0.130375
	1475	0.0568519	0.187151	-0.130299
	1476	0.0569278	0.187151	-0.130224
	1477	0.0570037	0.187151	-0.130148
	1478	0.0570829	0.187151	-0.130069
	1479	0.0571588	0.187151	-0.129993
	1480	0.0569816	0.187151	-0.13017
